# Supplementary material for: Immunomodulating Therapies in Acute Myocarditis and Recurrent/Acute Pericarditis
Source: PubMed Central journal article supplement (PMC8958011; doi:10.3389/fmed.2022.838564), 2022-03-07
Supplement: Table_1.pdf [file Table_1.pdf]

**SUPPLEMENTAL TABLE 1. Case reports and cases series of published mRNA COVID-19 Related acute myocarditis up to mid-August 2021**

| Authorship                   | Journal                   | Publication date | Type of study | N° patients | Age | Male Sex | Type of vaccine                                      | Dose              | Days after last dose | Clinical outcome |
|------------------------------|---------------------------|------------------|---------------|-------------|-----|----------|------------------------------------------------------|-------------------|----------------------|------------------|
| <b>Ammirati E, et al.</b>    | Int J Cardiol Heart Vasc. | 31/03/2021       | Case report   | 1           | 56  | M        | BNT162b2                                             | 1st and 2nd       | 3                    | Alive            |
| <b>Garcia JB, et al.</b>     | Rev Esp Cardiol.          | 27/04/2021       | Case report   | 1           | 39  | M        | BNT162b2                                             | 1st               | 21                   | Alive            |
| <b>Albert E, et al.</b>      | Radiol Case Rep           | 18/05/2021       | Case report   | 1           | 24  | M        | mRNA-1273                                            | 1st and 2nd       | 4                    | Alive            |
| <b>D'Angelo T, et al.</b>    | Can J Cardiol.            | 09/06/2021       | Case report   | 1           | 30  | M        | BNT162b2                                             | 1st               | 21                   | Alive            |
| <b>McLean K, et al.</b>      | Acad Emerg Med.           | 16/06/2021       | Case report   | 1           | 16  | M        | BNT162b2                                             | 1st and 2nd       | 3                    | Alive            |
| <b>Kim HW, et al.</b>        | JAMA Cardiol.             | 29/06/2021       | Case series   | 4           | 30  | 3 / 4    | mRNA-1273 50% ; BNT162b2 50%                         | 1st and 2nd       | 2,5                  | Alive (4 / 4)    |
| <b>Montgomery, et al.</b>    | JAMA Cardiol.             | 29/06/2021       | Case series   | 24          | 25  | 24 / 24  | BNT162b2 29,2 % ; mRNA-1273 70,8 %                   | 1st and 2nd       | 2                    | Alive (24 / 24)  |
| <b>Abu Mouch S, et al.</b>   | Vaccine                   | 29/06/2021       | Case series   | 6           | 22  | 6 / 6    | BNT162b2 100%                                        | 1st and 2nd 83,3% | 5                    | Alive (6 / 6)    |
| <b>Cereda A, et al.</b>      | Anatol J Cardiol.         | 09/07/2021       | Case report   | 1           | 21  | M        | BNT162b2                                             | 1st and 2nd       | 3                    | Alive            |
| <b>Starekova J, et al.</b>   | Radiology                 | 20/07/2021       | Case series   | 5           | 21  | 4/5      | BNT162b2 60% ; mRNA-1273 40%                         | 1st and 2nd       | 3                    | Alive (5 / 5)    |
| <b>Cimaglia P, et al.</b>    | Rev Port Cardiol.         | 24/07/2021       | Case report   | 1           | 24  | M        | BNT162b2                                             | 1st and 2nd       | 5                    | Alive            |
| <b>Nassar M, et al.</b>      | Diabetes Metab Syndr.     | 28/07/2021       | Case report   | 1           | 70  | F        | Ad26.COV2.S                                          | -                 | 2                    | Deceased         |
| <b>Marshall M, et al.</b>    | Pediatrics                | 01/08/2021       | Case series   | 7           | 17  | 7 / 7    | BNT162b2 100%                                        | 1st and 2nd       | 3                    | Alive (7 / 7)    |
| <b>Dionne A, et al.</b>      | JAMA Cardiol.             | 10/08/2021       | Case series   | 15          | 15  | 14 / 15  | BNT162b2 100%                                        | 1st and 2nd       | 3                    | Alive (15 / 15)  |
| <b>Larson KF, et al.</b>     | Circulation               | 10/08/2021       | Case series   | 6           | 28  | 6 / 6    | mRNA-1273 50% ; BNT162b2 50%                         | 1st and 2nd 83,3% | 2,5                  | Alive (6 / 6)    |
| <b>Muthukumar A, et al.</b>  | Circulation               | 10/08/2021       | Case report   | 1           | 52  | M        | mRNA-1273                                            | 1st and 2nd       | 3                    | Alive            |
| <b>Rosner CM, et al.</b>     | Circulation               | 10/08/2021       | Case series   | 7           | 24  | 7 / 7    | BNT162b2 71,4% ; mRNA-1273 14,3% ; Ad26.COV2.S 14,3% | 1st and 2nd 80%   | 3                    | Alive (7 / 7)    |
| <b>Abbate A, et al.</b>      | Int J Cardiol.            | 12/08/2021       | Case series   | 2           | 30  | 1 / 2    | BNT162b2 100%                                        | 1st and 2nd 50%   | 5                    | Alive (1 / 2)    |
| <b>Verma AK, et al.</b>      | N Engl J Med.             | 12/08/2021       | Case series   | 2           | 44  | 1 / 2    | mRNA-1273 50% ; BNT162b2 50%                         | 1st and 2nd 50%   | 12                   | Alive (1 / 2)    |
| <b>Sulemankhil I, et al.</b> | Cardiovasc Revasc Med.    | 12/08/2021       | Case report   | 1           | 33  | M        | Ad26.COV2.S                                          | -                 | 2                    | Alive            |
