# Supplementary material for: Immunomodulating Therapies in Acute Myocarditis and Recurrent/Acute Pericarditis
Source: PubMed Central journal article supplement (PMC8958011; doi:10.3389/fmed.2022.838564), 2022-03-07
Supplement: Table_2.pdf [file Table_2.pdf]

**SUPPLEMENTAL TABLE 2. Characteristics and Therapies of published cases of mRNA COVID-19 Related acute myocarditis up to mid-August 2021**

| Authorship            | Fever | Chest pain | Normal EKG | ST Elevation | Pericardial effusion | Lowest ejection fraction | CMR   | LGE epicardial pattern | Immunomodulatory treatment | Vasopressors / Intubation / ECMO |
|-----------------------|-------|------------|------------|--------------|----------------------|--------------------------|-------|------------------------|----------------------------|----------------------------------|
| Ammirati E, et al.    | Yes   | Yes        | 0          | Yes          | No                   | 60                       | Yes   | Yes                    | No                         | No                               |
| García JB, et al.     | Yes   | Yes        | 0          | Yes          | No                   | 60                       | Yes   | Yes                    | No                         | No                               |
| Albert E, et al.      | Yes   | Yes        | 1          | No           | No                   | 65                       | Yes   | Yes                    | No                         | No                               |
| D'Angelo T, et al.    | Yes   | Yes        | 0          | Yes          | Yes                  | 60                       | Yes   | Yes                    | Yes                        | No                               |
| McLean K, et al.      | Yes   | Yes        | 0          | Yes          | No                   | 61                       | Yes   | NA                     | Yes                        | No                               |
| Kim HW, et al.        | 3/4   | 1/4        | 0          | 4/4          | 4/4                  | 55                       | 4/4   | 4/4                    | 3/4                        | No                               |
| Montgomery , et al    | 24/24 | 24/24      | 4/24       | 0/24         | 0/24                 | 55                       | 24/24 | NA                     | NA                         | No                               |
| Abu Mouch S, et al.   | 6/6   | 6/6        | 0/6        | 5/6          | 0/6                  | 55                       | 6/6   | 6/6                    | 6/6                        | No                               |
| Cereda A, et al.      | Yes   | Yes        | 0          | Yes          | No                   | 50                       | Yes   | Yes                    | Yes                        | No                               |
| Starekova J, et al.   | 3/5   | 5/5        | NA         | 2/5          | 3/5                  | 54                       | 5/5   | 5/5                    | 0/5                        | No                               |
| Cimaglia P, et al.    | Yes   | Yes        | 0          | Yes          | No                   | 45                       | Yes   | Yes                    | Yes                        | No                               |
| Nassar M, et al.      | Yes   | No         | 0          | No           | No                   | 10                       | No    | NA                     | No                         | Yes                              |
| Marshall M, et al.    | 5/7   | 7/7        | 0/7        | 6/7          | 0/7                  | 60                       | 7/7   | 4/7                    | 7/7                        | No                               |
| Dionne A, et al.      | 15/15 | 15/15      | 6/15       | 9/15         | 0/15                 | 58                       | 15/15 | NA                     | 7/15                       | No                               |
| Larson KF, et al.     | 4/6   | 6/6        | 1/6        | 5/6          | 2/6                  | 50                       | 6/6   | 2/6                    | 4/6                        | No                               |
| Muthukumar A, et al.  | Yes   | Yes        | 0          | No           | No                   | 60                       | Yes   | Yes                    | No                         | No                               |
| Rosner CM, et al.     | 2/6   | 6/6        | 2/6        | 3/6          | 0/6                  | 50                       | 6/6   | 6/6                    | 3/6                        | No                               |
| Abbate A, et al.      | 2/2   | 2/2        | 0/2        | 2/2          | 2/2                  | 17,5                     | 1/2   | 1/2                    | 2/2                        | Yes                              |
| Verma AK, et al.      | 2/2   | 2/2        | 0/2        | 1/2          | 0/2                  | 15                       | 1/2   | NA                     | 2/2                        | 1/2                              |
| Sulemankhil I, et al. | No    | Yes        | 1          | No           | No                   | 60                       | Yes   | Yes                    | No                         | No                               |
